# Supplementary material
Source: MDPI journal article supplement (https://www.mdpi.com/2071-1050/14/21/14481)
Supplement: s1 [file s1]

Table S1. Items of the questionnaire that were submitted to the participants.

| <b>Code</b>    | <b>Item</b>                                                                                |
|----------------|--------------------------------------------------------------------------------------------|
| Gender         | Gender                                                                                     |
| Age            | Age                                                                                        |
| Marital_status | Marital status                                                                             |
| N_children     | Number of children                                                                         |
| Education      | Educational level                                                                          |
| Monthly_income | Monthly income                                                                             |
| ATT_01         | Going to Riyadh Season is good                                                             |
| ATT_02         | Going to Riyadh Season is valuable                                                         |
| ATT_03         | Going to Riyadh Season is beneficial                                                       |
| ATT_04         | Going to Riyadh Season is enjoyable                                                        |
| PBC_01         | I am capable of going to Riyadh season                                                     |
| PBC_02         | I am confident that, if I want to, I can go to Riyadh Season                               |
| PBC_03         | I have enough resources, time, and opportunities to go to Riyadh season                    |
| SNM_01         | Most people who are important to me think I should travel to Riyadh Season                 |
| SNM_02         | Most people who are important to me want me to travel to Riyadh Season                     |
| SNM_03         | People whose opinions I value prefer that I choose Riyadh Season for my next vacation trip |
| INT_01         | I intend to travel to Riyadh Season in the next two years                                  |
| INT_02         | I am planning to travel to Riyadh Season in the next two years                             |
| INT_03         | I will make an effort to travel to Riyadh Season the next two years                        |
| INT_04         | I will certainly invest time and money to travel to Riyadh Season in the next two years    |
| SNS content    | The content helped me plan/organize my activities for Riyadh Season                        |
| SNS use        | How many hours do you spend per week on social media?                                      |
| TES            | How often you write about your trip experience on social media                             |

Table S2: outcomes of the model heterotrait-monotrait ratio (HTMT).

|                      | 1     | 2     | 3     | 4     | 5     | 6     | 7     | 8     | 9     |
|----------------------|-------|-------|-------|-------|-------|-------|-------|-------|-------|
| 1. ATT               | .     |       |       |       |       |       |       |       |       |
| 2. PBC               | 0.589 | .     |       |       |       |       |       |       |       |
| 3. SNM               | 0.644 | 0.794 | .     |       |       |       |       |       |       |
| 4. SNS use           | 0.117 | 0.106 | 0.143 | .     |       |       |       |       |       |
| 5. SNS content       | 0.312 | 0.419 | 0.465 | 0.015 | .     |       |       |       |       |
| 6. TES               | 0.066 | 0.149 | 0.107 | 0.055 | 0.096 | .     |       |       |       |
| 7. SNS use × SNM     | 0.134 | 0.195 | 0.212 | 0.053 | 0.104 | 0.066 | .     |       |       |
| 8. SNS content × SNM | 0.335 | 0.463 | 0.538 | 0.072 | 0.228 | 0.102 | 0.239 | .     |       |
| 9. TES × SNM         | 0.110 | 0.112 | 0.138 | 0.062 | 0.139 | 0.063 | 0.271 | 0.143 | .     |
| 10. INT              | 0.548 | 0.720 | 0.835 | 0.125 | 0.512 | 0.197 | 0.177 | 0.440 | 0.116 |

ATT: attitude; AVE: average variance extracted;  $\alpha$ : Cronbach's alpha; CR: Composite Reliability; FL: Factor loading; PBC: perceived behavior control; SNM: subjective norms; SNS: social network servicing; INT: intention to visit; TES: trip experience sharing.

Table S3: Results of the mean and confidence intervals for the bootstrap heterotrait-monotrait ratio (HTMT).

| Parameter                      | T Stat. | Bootstrap mean<br>HTMT (95%CI) |
|--------------------------------|---------|--------------------------------|
| ATT -> PBC                     | 10.64   | 0.59 (0.49 to 0.67)            |
| ATT -> SNM                     | 10.9    | 0.64 (0.54 to 0.73)            |
| ATT -> SNS use                 | 2.16    | 0.13 (0.04 to 0.22)            |
| ATT -> SNM*SNS use             | 2.12    | 0.16 (0.09 to 0.28)            |
| ATT -> SNS content             | 4.65    | 0.31 (0.20 to 0.42)            |
| ATT -> SNM*SNS content         | 4.68    | 0.33 (0.21 to 0.44)            |
| ATT -> TES                     | 1.96    | 0.08 (0.03 to 0.14)            |
| ATT -> SNM*TES                 | 1.97    | 0.14 (0.07 to 0.26)            |
| ATT -> INT                     | 7.97    | 0.55 (0.43 to 0.65)            |
| PBC -> SNM                     | 16.6    | 0.80 (0.71 to 0.87)            |
| PBC -> SNS use                 | 2.26    | 0.12 (0.06 to 0.21)            |
| PBC -> SNM*SNS use             | 2.69    | 0.21 (0.10 to 0.34)            |
| PBC -> SNS content             | 6.63    | 0.42 (0.31 to 0.52)            |
| PBC -> SNM*SNS content         | 7.96    | 0.46 (0.36 to 0.54)            |
| PBC -> TES                     | 2.48    | 0.15 (0.06 to 0.25)            |
| PBC -> SNM*TES                 | 1.76    | 0.14 (0.06 to 0.27)            |
| PBC -> INT                     | 13.42   | 0.72 (0.63 to 0.80)            |
| SNM -> SNS use                 | 2.66    | 0.15 (0.07 to 0.24)            |
| SNM -> SNM*SNS use             | 2.21    | 0.23 (0.08 to 0.39)            |
| SNM -> SNS content             | 7.76    | 0.46 (0.37 to 0.56)            |
| SNM -> SNM*SNS content         | 9.05    | 0.53 (0.43 to 0.62)            |
| SNM -> TES                     | 2.23    | 0.12 (0.05 to 0.21)            |
| SNM -> SNM*TES                 | 1.86    | 0.17 (0.07 to 0.31)            |
| SNM -> INT                     | 17.82   | 0.84 (0.75 to 0.91)            |
| SNS use -> SNM*SNS use         | 1.37    | 0.09 (0.04 to 0.16)            |
| SNS use -> SNS content         | 0.46    | 0.04 (0.00 to 0.10)            |
| SNS use -> SNM*SNS content     | 1.89    | 0.08 (0.03 to 0.15)            |
| SNS use -> TES                 | 1.22    | 0.06 (0.01 to 0.15)            |
| SNS use -> SNM*TES             | 1.85    | 0.08 (0.04 to 0.14)            |
| SNS use -> INT                 | 2.53    | 0.13 (0.06 to 0.22)            |
| SNM*SNS use -> SNS content     | 1.94    | 0.12 (0.04 to 0.22)            |
| SNM*SNS use -> SNM*SNS content | 2.8     | 0.25 (0.11 to 0.39)            |
| SNM*SNS use -> TES             | 1.88    | 0.09 (0.04 to 0.15)            |
| SNM*SNS use -> SNM*TES         | 2.19    | 0.29 (0.10 to 0.50)            |
| SNM*SNS use -> INT             | 2.42    | 0.19 (0.09 to 0.32)            |
| SNS content -> SNM*SNS content | 3.28    | 0.23 (0.10 to 0.34)            |
| SNS content -> TES             | 1.84    | 0.10 (0.02 to 0.18)            |
| SNS content -> SNM*TES         | 1.93    | 0.15 (0.05 to 0.28)            |
| SNS content -> INT             | 8.49    | 0.51 (0.41 to 0.60)            |
| SNM*SNS content -> TES         | 1.9     | 0.11 (0.04 to 0.21)            |
| SNM*SNS content -> SNM*TES     | 1.37    | 0.19 (0.06 to 0.39)            |
| SNM*SNS content -> INT         | 6.04    | 0.44 (0.31 to 0.54)            |

|                |      |                     |
|----------------|------|---------------------|
| TES -> SNM*TES | 1.47 | 0.09 (0.03 to 0.17) |
| TES -> INT     | 2.94 | 0.20 (0.09 to 0.30) |
| SNM*TES -> INT | 1.68 | 0.16 (0.07 to 0.29) |

---
